# Supplementary material for: Hypoxia Upregulates Mitotic Cyclins Which Contribute to the Multipotency of Human Mesenchymal Stem Cells by Expanding Proliferation Lifespan
Source: PubMed Central journal article supplement — Mol Cells. 2018 Feb 21;41(3):207–13. doi: 10.14348/molcells.2018.2231 (PMC5881094; doi:10.14348/molcells.2018.2231), 2018-02-21
Supplement: molce-41-3-207-supple.pdf [file molce-41-3-207-supple.pdf]

# Supplementary Fig. 1. (Lee et al)

**A**

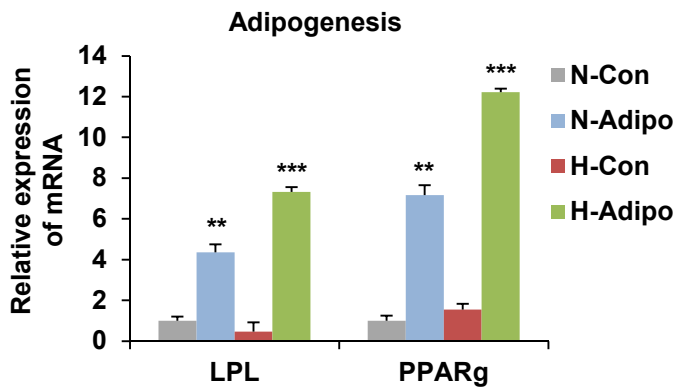

**B**

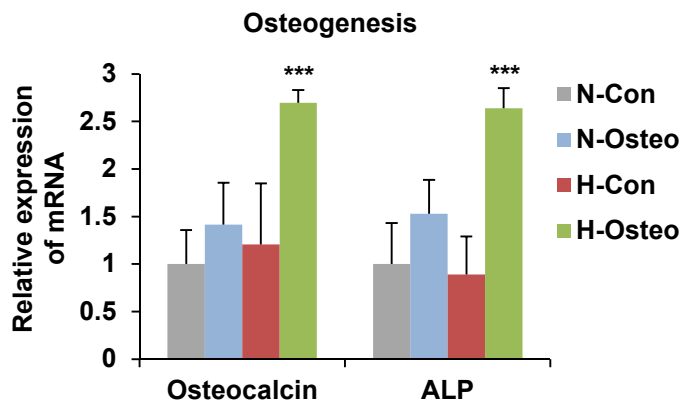

## Supplementary Figure Legend

### Supplementary Fig. 1.

(A and B) Eight passaged MSCs were differentiated into adipocyte or osteoblast in normoxic (N-) and hypoxic (H-) conditions. The levels of adipocyte (LPL and PPARg) and osteoblast (Osteocalcin and ALP) markers were measured by qRT-PCR. Error bars represent mean  $\pm$  SEM. \*\* $P < 0.01$  and \*\*\* $P < 0.001$  versus control.
